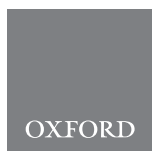

## REVIEW

# Sleep–wake regulation and the hallmarks of the pathogenesis of Alzheimer’s disease

Maxime Van Egroo<sup>1,•</sup>, Justinas Narbutas<sup>1,2</sup>, Daphne Chylinski<sup>1</sup>, Pamela Villar González<sup>1</sup>, Pierre Maquet<sup>1,3</sup>, Eric Salmon<sup>1,2,3</sup>, Christine Bastin<sup>1,2</sup>, Fabienne Collette<sup>1,2</sup> and Gilles Vandewalle<sup>1,\*</sup>

<sup>1</sup>GIGA-Cyclotron Research Centre-In Vivo Imaging, University of Liège, Liège, Belgium, <sup>2</sup>Psychology and Cognitive Neuroscience Research Unit, University of Liège, Liège, Belgium and <sup>3</sup>Department of Neurology, University Hospital of Liège, Liège, Belgium

\*Corresponding author. Gilles Vandewalle, GIGA-Cyclotron Research Centre-In Vivo Imaging, Bâtiment B30, Allée du VI Août, 8, 4000 Liège, Belgium. Email: [gilles.vandewalle@uliege.be](mailto:gilles.vandewalle@uliege.be).

## Abstract

While efficient treatments for Alzheimer’s disease (AD) remain elusive, a growing body of research has highlighted sleep–wake regulation as a potential modifiable factor to delay disease progression. Evidence accumulated in recent years is pointing toward a tight link between sleep–wake disruption and the three main hallmarks of the pathogenesis of AD, i.e. abnormal amyloid-beta (A $\beta$ ) and tau proteins accumulation, and neurodegeneration. However, all three hallmarks are rarely considered together in the same study. In this review, we gather and discuss findings in favor of an association between sleep–wake disruption and each AD hallmark in animal models and in humans, with a focus on the preclinical stages of the disease. We emphasize that these relationships are likely bidirectional for each of these hallmarks. Altogether, current findings provide strong support for considering sleep–wake disruption as a true risk factor in the early unfolding of AD, but more research integrating recent technical advances is needed, particularly with respect to tau protein and neurodegeneration. Interventional longitudinal studies among cognitively healthy older individuals should assess the practical use of improving sleep–wake regulation to slow down the progression of AD pathogenesis.

## Statement of Significance

Here, we integrate within a single review the findings associating sleep–wake regulation and the three main hallmarks of Alzheimer’s disease (AD) pathogenesis in the preclinical stages of the disease. The causality of these relationships is discussed and the emphasis is placed on the bidirectionality between sleep–wake quality and AD neuropathological processes. As current research provides strong support for considering sleep–wake disruption as a true risk factor in the early unfolding of AD, the practical use of improving sleep and wakefulness to hinder AD pathogenesis should be further investigated by researchers and clinicians.

**Key words:** sleep–wake regulation; circadian rhythms; Alzheimer’s disease; cognitive decline; amyloid-beta; tau; neurodegeneration

Submitted: 7 September, 2018; Revised: 26 November, 2018

© Sleep Research Society 2019. Published by Oxford University Press on behalf of the Sleep Research Society.

All rights reserved. For permissions, please e-mail [journals.permissions@oup.com](mailto:journals.permissions@oup.com).

## Introduction

The current search for an Alzheimer's disease (AD) treatment, although encouraging, is still failing to provide efficient therapies to significantly delay disease progression, and the existing ones only grant marginal symptomatic relief [1]. Indeed, several recent clinical trials were unsuccessful in developing new drug therapies against AD [2, 3]. With an estimated healthcare cost of 818 billion US dollars per year worldwide, AD, the most prevalent form of dementia, represents an important socioeconomic and scientific challenge in our ever-aging society [4]. Some consider that delaying the onset of AD by just 5 years would decrease AD costs by 40% [5]. Early detection and prevention are promising means to reach this objective [6]. However, only 30% of AD cases are considered to be associated with recognized environmental risk factors for AD (diabetes, low education, smoking, lack of physical activity, hypertension, and depression) and acting on them would only moderately attenuate the foreseen increase in AD prevalence [7]. Hence, identifying novel modifiable protective and risk factors for AD is crucially needed. These novel factors should facilitate the early detection of an increased risk for AD, even in asymptomatic individuals, and allow for more efficient prevention [6]. In the present review paper, we argue that the regulation of the sleep–wake cycle and its disruption constitute such novel factors. The last decade has indeed seen a growing body of evidence supporting the link between AD-related processes and the regulation of sleep and wakefulness [8–12]. Accordingly, a recent meta-analysis of 27 observational studies revealed that approximately 15% of AD in the population may be attributed to treatable sleep problems, and that individuals with sleep-related issues exhibit a 1.55 times higher risk of developing the disease [13].

The main pathophysiological hallmarks of AD are the abnormal accumulation in the brain of amyloid-beta ( $A\beta$ ) protein in plaques and of tau protein in neurofibrillary tangles (NFTs), together with neurodegeneration, i.e. synaptic and neuronal loss [14]. These hallmarks contribute to predicting the conversion of mild cognitive impairment (MCI), a prodromal phase of AD, to fully declared AD [15, 16]. Importantly, it is now well established that  $A\beta$  and tau protein accumulations as well as brain atrophy start decades before MCI or AD symptoms onset. A period corresponding to AD “preclinical” stages has therefore been proposed and encompasses the 10 to 20 years preceding observable cognitive impairments [15, 17]. It is important to stress that AD preclinical stages reflect an increased risk for the disease rather than being a deterministic feature: whether and when one will develop symptomatic AD cannot be established based solely on the presence of AD pathophysiological hallmarks. Nevertheless, together with Apolipoprotein E (APOE) polymorphism, the strongest genetic risk factor for sporadic AD [18–20], these pathophysiological changes offer the current best bases for applying prevention strategies to individuals at risk of developing sporadic AD.

Here, we provide a narrative review of the evidence for the relationship between the disruption of the sleep–wake cycle and the hallmarks of AD (i.e.  $A\beta$  burden, tau burden, and neurodegeneration) during its preclinical stages, both in humans and animal models. The papers linking sleep–wake regulation and AD pathophysiology that were considered are summarized in an overview table for each hallmark, i.e. (Table 1) for the  $A\beta$  section, (Table 2) for the tau section, and (Table 3)

for the neurodegeneration section. We will only discuss the late-onset sporadic form of AD as it represents the vast majority of AD cases compared with the early-onset familial form which accounts for less than 5% of AD cases [21, 22].

## Sleep–Wake Regulation and Amyloid-Beta

$A\beta$  refers to peptides of 36–43 amino acids that normally exist in the brain in a soluble form but become toxic when aggregated into diffusible oligomers [23] and eventually form extracellular insoluble amyloid plaques [24]. In nonpathological conditions, the physiological role of  $A\beta$  is uncertain but is suspected to participate to normal synaptic function [23].  $A\beta_{40}$  is the major  $A\beta$  species (~80%–90%) produced by  $\beta$ - and  $\gamma$ -secretase in the sequential enzymatic cleavage of the larger transmembrane amyloid precursor protein (APP).  $A\beta_{42}$ , one of the minor species (~5%–10%), plays a crucial role in the aggregation of amyloid into plaques because of its hydrophobic and fibrillogenic properties [25–27]. One can monitor AD pathophysiology progression with positron emission tomography (PET) using  $A\beta$  ligands, but  $A\beta_{42}$  assay in the cerebrospinal fluid (CSF) is also a sensitive and common biomarker for AD. In fact, lower CSF  $A\beta_{42}$  concentration is thought to reflect and even to precede amyloid plaque formation in the brain [28, 29].

The AD-related pathophysiological process of  $A\beta$  follows a stereotyped progression pattern, with  $A\beta$  deposits first found in the neocortex. As the disease progresses, allocortical brain regions (e.g. entorhinal cortex and hippocampus) are involved as well as nuclei from the basal forebrain. Ultimately,  $A\beta$  burden encompasses brainstem nuclei and the cerebellum [30]. The prevailing theory of AD pathogenesis hypothesizes that the accumulation of  $A\beta$  into insoluble plaques is the key initiator of a series of pathogenic processes that eventually lead to AD [31, 32]. At first, changes in  $A\beta$  levels caused by an increase in total  $A\beta$  production and/or a reduced clearance result in  $A\beta$  deposits that impede synaptic function and diminish long-term potentiation of neuronal circuits. Inflammatory responses and plaque formation further amplify synaptic and neuronal damage, precipitating widespread neuronal dysfunction, cell death, and ultimately dementia with plaque and tangle pathology [33]. Although the broad outlines of the so-called “amyloid cascade hypothesis” have been supported by the work of many researchers, whether  $A\beta$  accumulation is the prime event in the development of AD neuropathological processes is still not clearly established [34–38]. Furthermore, soluble forms of  $A\beta$ , i.e. the precursors that subsequently lead to  $A\beta$  plaques, might be more toxic than the aggregated insoluble forms: oligomeric neurotoxic species of  $A\beta$  bind to different components of neuronal and non-neuronal plasma membranes and induce complex patterns of synaptic dysfunction and synapse loss [23].

The striking role of the sleep–wake cycle in the unfolding of  $A\beta$  pathology finds its roots in two landmark findings: the discovery that soluble  $A\beta$  dynamics are strongly associated with sleep and wakefulness [39, 40], and the existence of a sleep-related metabolite clearance system in the brain [41, 42]. Using *in vivo* microdialysis, Kang and colleagues [39] investigated hippocampal  $A\beta$  levels during wakefulness and sleep in wild-type mice and Tg2576 mice, a well-characterized mouse model of AD known to overexpress a mutant form of human APP [43, 44]. First, they found that interstitial fluid (ISF)  $A\beta$  levels of Tg2576

**Table 1.** Summary table of studies considered in this review and directly linking sleep-wake regulation to amyloid-beta

| Reference             | Target population (N, age)                                                                                                                                                                 | Sleep-wake variable(s)                                                                                     | A $\beta$ variable(s)                                                             | Main outcome(s)                                                                                                                                                                                                                                                                           |
|-----------------------|--------------------------------------------------------------------------------------------------------------------------------------------------------------------------------------------|------------------------------------------------------------------------------------------------------------|-----------------------------------------------------------------------------------|-------------------------------------------------------------------------------------------------------------------------------------------------------------------------------------------------------------------------------------------------------------------------------------------|
| Branger et al., 2016  | Cognitively normal participants (51, 64.1 $\pm$ 10.6 years)                                                                                                                                | Self-reported sleep latency and sleep quality                                                              | Cortex A $\beta$ burden                                                           | Longer sleep latency and poorer sleep quality were associated with increased A $\beta$ burden                                                                                                                                                                                             |
| Brown et al., 2016    | Cognitively normal participants (184, 75.5 $\pm$ 6.1 years)                                                                                                                                | Sleep latency                                                                                              | Cortex A $\beta$ burden                                                           | Longer sleep latency was associated with increased A $\beta$ burden                                                                                                                                                                                                                       |
| Busche et al., 2015   | APP23xPS45 mice (5, 6–8 months), wild-type mice (6, 6–8 months)                                                                                                                            | Long-range SWA coherence                                                                                   | Cortex, hippocampus, and thalamus A $\beta$ burden, exogenous A $\beta$ infusion  | SWA coherence between cortex and hippocampus was disrupted in transgenic mice<br>A $\beta$ administration was associated with impaired SWA coherence in wild-type mice                                                                                                                    |
| Carvalho et al., 2018 | Cognitively normal participants (283, 77.1 $\pm$ 4.8 years)                                                                                                                                | ESS                                                                                                        | Longitudinal A $\beta$ accumulation                                               | Excessive daytime sleepiness was associated with increased A $\beta$ accumulation over 7 years of follow-up                                                                                                                                                                               |
| Chen et al., 2017     | Male Sprague-Dawley rats (40, 3 months)                                                                                                                                                    | 2–4 days of paradoxical sleep deprivation                                                                  | Hippocampus A $\beta$ burden                                                      | Acute sleep deprivation was associated with increased A $\beta$ burden                                                                                                                                                                                                                    |
| Dissel et al., 2017   | Adult UAS-APP:BACE flies (30, 7 days)                                                                                                                                                      | Sleep latency, sleep fragmentation, sleep duration                                                         | Human APP and BACE co-expression                                                  | Co-expression of APP and BACE was associated with reduced sleep duration and increased sleep fragmentation                                                                                                                                                                                |
| Elias et al., 2018    | Male cognitively normal OSA patients (42, 67.69 $\pm$ 5.37 years) and controls (77, 68.3 $\pm$ 3.86 years)                                                                                 | Apnea-hypopnea index                                                                                       | Cortex A $\beta$ burden                                                           | A $\beta$ burden was increased in OSA patients compared to controls                                                                                                                                                                                                                       |
| Ju et al., 2013       | Cognitively normal participants (142, 65.6 $\pm$ 8.2 years)                                                                                                                                | 2 weeks of at-home actigraphic recording                                                                   | CSF-A $\beta$ level                                                               | Worse sleep efficiency was associated with abnormal CSF-A $\beta$ level                                                                                                                                                                                                                   |
| Ju et al., 2016       | Cognitively normal OSA patients (10, 48–62) and controls (31, 45.8–65.7 years)                                                                                                             | Apnea-hypopnea index, NREM SWA                                                                             | CSF-A $\beta$ level                                                               | Reduced NREM SWA was associated with increased CSF-A $\beta$ level in controls<br>Higher apnea-hypopnea index was associated with abnormal CSF-A $\beta$ level                                                                                                                            |
| Ju et al., 2017       | Cognitively normal participants (14, 35–65 years)                                                                                                                                          | 1 night of specific SWA disruption                                                                         | CSF-A $\beta$ level                                                               | Specific SWA disruption was associated with higher CSF-A $\beta$ level                                                                                                                                                                                                                    |
| Kang et al., 2009     | Tg2576 mice (16, 3–9.5 months), C57BL6/SJL mice (20, 4 months), APP <sup>SWL</sup> /PS1 <sup>ΔE9</sup> mice (38, 1.7–3.5 months)<br>Male cognitively normal participants (10, 20–50 years) | Acute sleep deprivation, sleep restriction to 4h/day for 3 weeks, almorexant injection (1/day for 8 weeks) | ISF-A $\beta$ level, CSF-A $\beta$ level, cortex and hippocampus A $\beta$ burden | ISF- and CSF-A $\beta$ levels showed fluctuations over a 24 hr period<br>Acute and chronic sleep deprivation were associated with increased ISF-A $\beta$ level and increased A $\beta$ burden, respectively<br>Chronic almorexant injection was associated with reduced A $\beta$ burden |
| Lucey et al., 2018    | Cognitively normal participants (8, 30–60 years)                                                                                                                                           | 1 night of sleep deprivation, 1 night of SWS augmentation                                                  | CSF-A $\beta$ level                                                               | Total sleep deprivation was associated with increased CSF-A $\beta$ level<br>No association between SWS augmentation and CSF-A $\beta$ level                                                                                                                                              |
| Mander et al., 2015   | Cognitively normal participants (26, 75.1 $\pm$ 8.2 years)                                                                                                                                 | NREM SWA                                                                                                   | Medial prefrontal cortex A $\beta$ burden                                         | Increased A $\beta$ burden was associated with impaired NREM SWA                                                                                                                                                                                                                          |
| Molano et al., 2017   | Cognitively normal participants (98, 69 $\pm$ 7.1 years)                                                                                                                                   | 2 weeks of at-home actigraphic recording                                                                   | CSF-A $\beta$ level                                                               | The interaction between worse sleep efficiency and abnormal CSF-A $\beta$ level was associated with poorer cognition                                                                                                                                                                      |
| Musiek et al., 2018   | Cognitively normal participants (148, 66.6 $\pm$ 8.3 years)                                                                                                                                | 1 week of at-home actigraphy                                                                               | Cortex A $\beta$ burden                                                           | Higher fragmentation of rest-activity circadian rhythm was associated with increased A $\beta$ burden                                                                                                                                                                                     |

Table 1. Continued

| Reference                  | Target population (N, age)                                                                                                              | Sleep-wake variable(s)                                          | A $\beta$ variable(s)                                          | Main outcome(s)                                                                                                                                                                 |
|----------------------------|-----------------------------------------------------------------------------------------------------------------------------------------|-----------------------------------------------------------------|----------------------------------------------------------------|---------------------------------------------------------------------------------------------------------------------------------------------------------------------------------|
| Ooms et al., 2014          | Male cognitively normal participants (26, 40–60 years)                                                                                  | 1 night of total sleep deprivation                              | CSF-A $\beta$ level                                            | Total sleep deprivation was associated with increased CSF-A $\beta$ level                                                                                                       |
| Roh et al., 2012           | APP <sup>SWE</sup> /PS1 <sup>AE9</sup> mice (32, 3–9 months)                                                                            | Wakefulness duration, NREM/REM sleep duration                   | Hippocampus A $\beta$ burden, active immunization to A $\beta$ | Increased A $\beta$ burden was associated with increased wakefulness duration and decreased NREM/REM duration<br>Active immunization to A $\beta$ restored the sleep-wake cycle |
| Roh et al., 2014           | APP <sup>SWE</sup> /PS1 <sup>AE9</sup> /OR <sup>-/-</sup> mice (12, 3–6 months), APP/PS1-21/OR <sup>-/-</sup> mice (12, 3.5–8.5 months) | Orexin modulation, sleep restriction to 4 hr/day for 3 weeks    | Cortex and hippocampus A $\beta$ burden                        | Transgenic orexin knockout mice displayed decreased A $\beta$ burden and increased sleep duration<br>Chronic sleep restriction was associated with increased A $\beta$ burden   |
| Sharma et al., 2018        | Cognitively normal OSA patients (111, 69.26 $\pm$ 7.41 years) and controls (97, 67.56 $\pm$ 7.32 years)                                 | Apnea-hypopnea index                                            | CSF-A $\beta$ level, longitudinal A $\beta$ accumulation       | Higher apnea-hypopnea index was associated with abnormal CSF-A $\beta$ level and increased A $\beta$ accumulation over 2 years of follow-up                                     |
| Shokri-Kojori et al., 2017 | Cognitively normal participants (24, 22–72 years)                                                                                       | 1 night of total sleep deprivation, self-reported sleep history | Hippocampus and thalamus A $\beta$ burden                      | Total sleep deprivation and poorer self-reported sleep history were associated with increased A $\beta$ burden                                                                  |
| Spira et al., 2013         | Cognitively normal participants (70, 53–91 years)                                                                                       | Self-reported sleep duration and sleep quality                  | Cortex and precuneus A $\beta$ burden                          | Poorer sleep quality and shorter sleep duration were associated with increased A $\beta$ burden                                                                                 |
| Spira et al., 2018         | Cognitively normal participants (123, 36.2–82.7 years)                                                                                  | Self-reported excessive daytime sleepiness and napping habits   | Longitudinal A $\beta$ accumulation                            | Excessive daytime sleepiness was associated with increased A $\beta$ burden over 15.7 years follow-up<br>No association between napping and A $\beta$ burden                    |
| Sprecher et al., 2015      | Cognitively normal participants (98, 50–73 years)                                                                                       | ESS, MOS                                                        | Cortex A $\beta$ burden                                        | Greater somnolence and sleep disturbances were associated with increased A $\beta$ burden                                                                                       |
| Sprecher et al., 2017      | Cognitively normal participants (101, 62.9 $\pm$ 6.2 years)                                                                             | MOS, ESS                                                        | CSF-A $\beta$ level                                            | Poorer sleep quality, greater sleep disturbance and daytime somnolence were associated with abnormal CSF-A $\beta$ level                                                        |
| Varga et al., 2016         | Cognitively normal participants (36, 66.8 $\pm$ 8.2 years)                                                                              | SWA, SWS duration                                               | CSF-A $\beta$ level                                            | Reduced SWA and SWS duration were associated with higher CSF-A $\beta$ level                                                                                                    |
| Xie et al., 2013           | C57BL6 mice (12, 3 months)                                                                                                              | Natural and induced sleep                                       | A $\beta$ glymphatic clearance rate                            | Natural and induced sleep were associated with a 60% increase in interstitial space volume, resulting in easier glymphatic clearance                                            |

APP = amyloid precursor protein; BACE = beta-secretase cleaving enzyme; CSF = cerebrospinal fluid; ESS = Epworth sleepiness scale; MOS = medical outcomes study sleep scale; NREM = nonrapid eye movement; REM = rapid eye movement.

mice exhibit a diurnal variation, with a significant decrease of approximately 25% during the light period (i.e. when mice sleep most) relative to the dark period. Crucially, they observed that the same pattern of variation is also present in the ISF of wild-type mice and in the CSF of young healthy humans, indicating that A $\beta$  fluctuation over a 24 hr period is inherent to normal cellular physiology. Furthermore, sleep-deprived mice showed significantly increased A $\beta$  levels that were promptly reduced after sleep recovery. To unravel the underlying molecular mechanisms, the potential role of orexin, a peptide promoting arousal and wakefulness [45–47], was put forward. Interestingly, orexin infusion increased ISF A $\beta$  levels during the light period, whereas an orexin receptor antagonist abolished the previously observed diurnal variation. At a broader level, chronic sleep

restriction in mice (20 hr daily for 21 days) was associated with greater A $\beta$  plaque burden among several brain regions, whereas enhancing sleep via chronic orexin antagonist treatment (once daily for 8 weeks) was related to reduced A $\beta$  plaque deposition.

The characterization of the sleep-wake modulation of A $\beta$  dynamics was further expanded to include a recently described process of brain cellular waste regulation, called the “glymphatic system” [42, 48]. This system consists in convective fluxes from the para-arterial CSF through ISF and toward the para-venous space that allow neuronal products to be transported to the systemic circulation for clearance [48, 49]. The glymphatic process can be altered by genetic variations affecting aquaporin 4 water channels [50] and has been linked to AD and other dementias [51]. Using two-photon imaging of the brain of living

**Table 2.** Summary table of studies considered in this review and directly linking sleep–wake regulation to tau

| Reference               | Target population (N, age)                                                                             | Sleep–wake variable(s)                                                      | Tau variable(s)                                   | Main outcome(s)                                                                                                                                            |
|-------------------------|--------------------------------------------------------------------------------------------------------|-----------------------------------------------------------------------------|---------------------------------------------------|------------------------------------------------------------------------------------------------------------------------------------------------------------|
| Arnulf et al., 2005     | PSP patients (15, 68 ± 8 years) and cognitively normal controls (15, 67 ± 10 years)                    | Sleep fragmentation, REM sleep without atonia, RBD                          | Brain tau accumulation without abnormal Aβ burden | Higher sleep fragmentation, longer REM sleep without atonia duration, and RBD in PSP patients compared to controls                                         |
| Bu et al., 2015         | Cognitively normal OSA patients (45, 44.31 ± 9.96 years)                                               | Apnea–hypopnea index                                                        | Serum tau level                                   | Higher apnea–hypopnea index was associated with higher serum tau level                                                                                     |
| Di Meco et al., 2014    | Male 3xTG mice (18, 10 months)                                                                         | Sleep restriction to 4 hr/day for 8 weeks                                   | Brain insoluble tau burden                        | Chronic sleep restriction was associated with increased insoluble tau level                                                                                |
| Elias et al., 2018      | Male cognitively normal OSA patients (42, 67.69 ± 5.37 years) and controls (77, 68.3 ± 3.86 years)     | Apnea–hypopnea index                                                        | Cortex tau burden                                 | No difference in tau burden in OSA patients compared with controls                                                                                         |
| Fjell et al., 2017      | Cognitively normal participants (91, 64–89 years)                                                      | PSQI                                                                        | CSF-tau level                                     | Higher CSF-tau level was predictive of worse sleep quality in Aβ positive individuals                                                                      |
| Holth et al., 2017      | Male P301S mice (40, 3–12 months)                                                                      | Wake bout duration, NREM/REM sleep duration                                 | Brainstem tau burden                              | Higher brainstem tau burden was associated with increased wakefulness, decreased NREM and REM sleep duration                                               |
| Ju et al., 2017         | Cognitively normal participants (14, 35–65 years)                                                      | 1 week of at-home actigraphic recording, 1 night of specific SWA disruption | CSF-tau level                                     | No association between SWA disruption and CSF-tau level. Better home sleep quality was associated with lower CSF-tau level                                 |
| Jyoti et al., 2015      | PLB1 <sup>triple</sup> mice (14, 5–21 months)                                                          | Wake bout duration, NREM/REM sleep duration                                 | Cortex and hippocampus tau burden                 | Tau burden was associated with increased wakefulness, and reduced NREM and REM sleep duration                                                              |
| Lim et al., 2013        | Cognitively normal participants (201, 85.9 ± 6.3 years)                                                | 10 days of actigraphic recordings                                           | Brain NFTs density at autopsy                     | Better sleep consolidation was associated with decreased NFTs density                                                                                      |
| Motamedi et al., 2017   | Cognitively normal OSA patients (50, 34.9 ± 8 years)                                                   | Apnea–hypopnea index                                                        | Plasma tau level                                  | Higher apnea–hypopnea index was associated with higher plasma tau level                                                                                    |
| Musiek et al., 2018     | Cognitively normal participants (148, 66.6 ± 8.3)                                                      | 1 week of at home actigraphy                                                | CSF-tau level                                     | Higher fragmentation of rest-activity circadian rhythm was associated with higher CSF-tau level                                                            |
| Ooms et al., 2014       | Cognitively normal men (26, 40–60 years)                                                               | 1 night of total sleep deprivation                                          | CSF-tau level                                     | No association between total sleep deprivation and CSF-tau level                                                                                           |
| Osorio et al., 2016     | Cognitively normal participants (63, 69.59 ± 8.55 years)                                               | CSF-orexin level                                                            | CSF-tau levels                                    | Higher CSF-orexin level was associated with higher CSF-tau levels                                                                                          |
| Platt et al., 2011      | PLB1 <sup>triple</sup> mice (11, 5–12 months)                                                          | Wake bout duration, NREM sleep duration                                     | Cortex and hippocampus tau burden                 | Tau burden was associated with increased wakefulness and reduced NREM sleep duration                                                                       |
| Qiu et al., 2016        | APP <sup>SWE</sup> /PS1 <sup>ΔE9</sup> mice (40, 4–10 months), wild-type littermates (40, 4–10 months) | Sleep restriction to 4 hr/day for 8 weeks                                   | Frontal cortex and hippocampus tau burden         | Chronic sleep deprivation was associated with long-lasting increased tau burden in both transgenic and wild-type mice                                      |
| Rothman et al., 2013    | Male 3xTG mice (10, 14 months)                                                                         | Sleep restriction to 6 hr/day for 6 weeks                                   | Cortex and hippocampus tau burden                 | Chronic sleep restriction was associated with increased cortical tau burden                                                                                |
| Sprecher et al., 2017   | Cognitively normal participants (101, 62.9 ± 6.2 years)                                                | MOS, ESS                                                                    | CSF-tau level                                     | Higher excessive daytime sleepiness and worse subjective sleep quality were associated with higher CSF-tau level                                           |
| Stevanovic et al., 2017 | Tg4510 mice (11, 8–13 months)                                                                          | Rest-activity circadian rhythm, clock gene (BMAL1, PER2) expression         | SCN and hippocampus tau burden                    | Tau burden was associated with altered SCN circadian outputs and clock protein (PER2) rhythm in the hippocampus                                            |
| Walsh et al., 2017      | PSP patients (19, 70.94 ± 5.3 years) and cognitively normal controls (16, 72.50 ± 1 years)             | Sleep latency, sleep duration, sleep fragmentation, subjective sleepiness   | Brain tau accumulation without abnormal Aβ burden | Longer sleep latency, lower sleep duration, higher sleep fragmentation, and higher subjective sleepiness were found in PSP patients compared with controls |

CSF = cerebrospinal fluid; ESS = Epworth sleepiness scale; MOS = medical outcomes study sleep scale; NREM = nonrapid eye movement; PSQI = Pittsburgh sleep quality index; RBD = rapid eye movement sleep behavior disorder; REM = rapid eye movement; SCN = suprachiasmatic nucleus.

adult mice, Xie et al. [42] found that the glymphatic system is strongly regulated by the sleep–wake cycle. They observed that the CSF influx was highly increased in the brain of sleeping and

anesthetized mice compared with awake littermates. In turn, the larger CSF influx led to a more efficient glymphatic clearance, as illustrated by a rate of interstitial Aβ removal up to twice



**Table 3.** Summary table of studies considered in this review and directly linking sleep–wake regulation to neurodegeneration

| Reference                     | Target population (N, age)                                | Sleep–wake variable(s)                                                             | Neurodegeneration variable(s)          | Main outcome(s)                                                                                                                                         |
|-------------------------------|-----------------------------------------------------------|------------------------------------------------------------------------------------|----------------------------------------|---------------------------------------------------------------------------------------------------------------------------------------------------------|
| Carvalho et al., 2017         | Cognitively normal participants (1374, 72.16 ± 8.8 years) | ESS, fatigue                                                                       | Grey matter integrity                  | Higher excessive daytime sleepiness and fatigue were associated with lower cortical thickness                                                           |
| Dubé et al., 2015             | Cognitively normal participants (63, 20–70 years)         | Sleep slow waves density and amplitude                                             | Grey matter integrity                  | Higher sleep slow waves density and amplitude were associated with higher grey matter integrity in sleep slow waves–related regions                     |
| Lo et al., 2014               | Cognitively normal participants (66, 69.5 ± 5.7 years)    | Self-reported sleep duration                                                       | Longitudinal ventricles expansion rate | Reduced sleep duration was associated with faster annual expansion rates of the ventricles over 2 years of follow-up                                    |
| Sanchez-Espinosa et al., 2014 | aMCI participants (21, 69.8 ± 5.5 years)                  | REM sleep duration                                                                 | Grey matter integrity                  | Lower REM sleep duration was associated with reduced grey matter integrity in brain regions involved in early stages of AD                              |
| Sexton et al., 2014           | Cognitively normal participants (147, 20.4–84.2 years)    | PSQI                                                                               | Longitudinal grey matter decline       | Worse sleep quality was associated with higher rates of grey matter atrophy over 3.5 years of follow-up                                                 |
| Spira et al., 2016            | Cognitively normal participants (122, 51–86 years)        | Self-reported sleep duration                                                       | Longitudinal grey matter decline       | Sleep durations of less or more than 7 hr were associated with higher rates of grey matter atrophy over 8 years of follow-up                            |
| Takeuchi et al., 2018         | Cognitively normal participants (1201, 18–27 years)       | Self-reported sleep continuity and sleep duration                                  | White matter integrity                 | Higher sleep continuity and lower sleep duration were associated with higher white matter integrity                                                     |
| Van Someren et al., 2018      | Cognitively normal participants (138, 69.1 ± 8.5 years)   | 1 week of at-home actigraphic recording                                            | Medial temporal lobe atrophy           | Higher fragmentation of rest-activity circadian rhythm was associated with higher medial temporal lobe atrophy                                          |
| Zhang et al., 2014            | Male Sirt3 wild-type mice (5, 2 months)                   | Sleep restriction to 4 hr/day                                                      | Number of locus coeruleus neurons      | Extended wakefulness was associated with a loss of neurons in the locus coeruleus                                                                       |
| Zhu et al., 2007              | Male C57BL/6J mice (10, 2 months)                         | Long-term intermittent hypoxia exposure for 8 weeks, sleep duration, sleep latency | Number of locus coeruleus neurons      | Chronic sleep disruption was associated with a loss of neurons in the locus coeruleus that had long-lasting effects on sleep duration and sleep latency |

aMCI = amnesic mild cognitive impairment; ESS = Epworth sleepiness scale; PSQI = Pittsburgh sleep quality index; REM = rapid eye movement.

as fast in sleeping mice. Interestingly, the authors found that the volume of the interstitial space was over 60% greater when mice were sleeping or anesthetized, thus allowing easier CSF movement and, therefore, more efficient glymphatic clearance of neuronal by-products such as A $\beta$ . Moreover, elevated A $\beta$  levels as a consequence of sleep deprivation have been observed in CSF samples both in humans [52] and in adult rats [53]. One night of sleep deprivation also appeared to significantly increase PET A $\beta$  plaque burden in the hippocampus and the thalamus in humans [54], although it is unclear how acute sleep deprivation may affect short-term plaque formation.

It seems that slow-wave sleep (SWS; or “deep sleep”, dominated by large amplitude and low-frequency EEG oscillations [55]) is a key component of the association between sleep–wake regulation and A $\beta$  aggregation. The release of soluble A $\beta$  in the interstitial space was shown to depend on endogenous neuronal activity, with extended wakefulness leading to an overall increase in neuronal firing and thus to elevated A $\beta$  levels [56–58]. In addition, slow-wave activity (SWA; a quantification of sleep slow waves during sleep) in frontal regions was associated with higher CSF A $\beta$ 42 levels in cognitively normal older individuals [59]. Finally, a recent study showed that specific disruption of SWS during one night induced higher levels of CSF A $\beta$ 40 on the following morning [60]. Altogether, these results suggest that reduction of SWS may lead to a relative augmentation in neuronal activity during sleep that, in turn, increases the production of A $\beta$  and/or reduces the

effectiveness of its clearance. Recent evidence shows that A $\beta$  concentration in the CSF increases following sleep deprivation, whereas it does not decrease when attempting to enhance SWS, which may suggest that altered A $\beta$  production, rather than its clearance, underlies the link between altered sleep and A $\beta$  levels [61]. It remains to be determined whether the well-established modification in sleep structure in older people, including a significant reduction of SWS duration [62, 63], contributes to or is, in part, a consequence of the age-related increase in A $\beta$  burden in healthy individuals [64].

The depicted relationship between sleep–wake disruption and A $\beta$  deposition is indeed most likely bidirectional [65–67]. Albeit we emphasized that sleep–wake disorganization accelerates A $\beta$  accumulation, it seems that A $\beta$  deposits conversely impede sleep–wake regulation. A transgenic APP mouse model showed changes in the sleep–wake cycle that closely followed the emergence of A $\beta$  plaques, and the intensity of these changes correlated with the extent of A $\beta$  deposits [58]. Interestingly, active A $\beta$  immunization prevented these sleep–wake modifications, suggesting a direct impact of the presence of A $\beta$  aggregates on sleep–wake regulation. Likewise, A $\beta$  accumulation impaired slow waves propagation during sleep in AD mice, whereas exogenous A $\beta$  infusion disrupted SWA in wild-type mice until wash-out [68]. In a *Drosophila* model of AD including human APP and beta-secretase cleaving enzyme expression, sleep is significantly disrupted when these proteins are co-expressed [69].

Many other associations between sleep–wake regulation and A $\beta$  are described below. We stress, however, that it is unclear whether these associations result from a causal impact of sleep–wake dysfunction or whether the latter may be a consequence of abnormal presence of A $\beta$ . For instance, several studies showed that self-reported sleep quality is associated with A $\beta$  deposition measured with PET and CSF markers in healthy older individuals [28, 70–72]. In two longitudinal studies, self-reported excessive daytime sleepiness at baseline was linked to increased accumulation of A $\beta$  over 7 and 15.7 years in cognitively normal older individuals [73, 74]. Self-reported sleep latency was also associated with brain A $\beta$  deposition in a well-characterized cohort of older men and women [72, 75], whereas poor self-reported sleep history was associated with increased A $\beta$  burden in the hippocampus and the thalamus [54]. Objective measures of sleep efficiency, based on actigraphic recordings, were also linked to abnormal levels of amyloid in the CSF in healthy older adults [76]. Likewise, an association was reported between PET A $\beta$  pathology in the medial prefrontal cortex and slow waves generation [77]. Obstructive sleep apnea (OSA), a well-established sleep disruption factor associated with a higher risk of developing cognitive impairments and AD [78], has been linked to increased CSF and PET A $\beta$  burden in cognitively normal older adults [79, 80]. One hypothesis is that glymphatic clearance processes are altered by mechanical changes during respiratory efforts in people with OSA, thus promoting protein accumulation [78, 81]. Finally, rest-activity rhythm fragmentation, objectively estimated by actigraphic measures, has recently been associated with PET A $\beta$  plaque burden, suggesting the implication of a circadian regulation of proteostasis [82]. This relationship remained significant after adjusting for age, implying that aging and preclinical A $\beta$  pathology likely have separate contributions on sleep–wake disturbances.

Crucially, the interaction between worse sleep efficiency and abnormal CSF amyloid levels may account for worse memory function in the preclinical stages of AD [83]. This could mean that beyond the respective negative impact of poor sleep–wake quality [84] and of A $\beta$  burden [85] on cognitive function, there may be an interaction effect that would lead to a multiplicative impact of both, at least when exceeding a certain threshold. However, isolating their respective contributions on cognition may constitute a difficult challenge since they are both changing importantly in aging.

The numerous findings reviewed here make a strong case for the bidirectional link between sleep–wake regulation and A $\beta$  deposition. Interestingly, low-dose benzodiazepine administration to AD mice improved SWS and cognition, suggesting a potential role for  $\gamma$ -aminobutyric acid inhibition to alleviate part of A $\beta$  negative impact through sleep [68]. It is unknown, however, whether acting on A $\beta$  per se and reducing its burden would result in an improved sleep–wake regulation. Likewise, no studies have yet attempted to act on sleep–wake quality to reduce A $\beta$  burden or to slow down its increase.

## Sleep–Wake Regulation and Tau

Tau is a microtubule-associated protein whose primary role is to maintain the stability of the axonal cytoskeleton [86]. In the course of several neurodegenerative diseases, including AD, tau undergoes abnormal hyperphosphorylation, oligomerization, and then conversion into insoluble filamentous state [87, 88].

Unable to interact with microtubules, hyperphosphorylated tau assembles into toxic oligomers which eventually form intracellular NFTs [89]. Whether these NFTs are toxic remains debated [90], as they may not impede normal neuronal function once released in the extracellular space upon neuron death [91]. As for A $\beta$ , the AD-related pathophysiological process of tau follows a stereotyped progression pattern [92]. As early as in the first decades of life, hyperphosphorylated tau can be found in the brainstem locus coeruleus and other subcortical nuclei [64, 93], which are key sites in sleep–wake regulation [94]. During the preclinical stages of AD, tau pathology is observed in the medial temporal lobe and further spreads to the neocortex as the disease progresses [95–97]. Interestingly, abnormal levels of tau protein in the CSF in preclinical AD constitute an accurate proxy measure of tau deposition in the temporal lobe, which in turn is a strong predictor of subsequent cognitive trajectory [98].

Critically, Yamada et al. [99] demonstrated using *in vivo* microdialysis in wild-type mice that increasing neuronal activity significantly elevated ISF tau levels within hours. Similar to A $\beta$  regulation processes, this indicates that a relative increase in neuronal activity, as observed during extended wakefulness or chronic sleep restriction, could lead to an increase in extracellular tau production that would ultimately be reflected in CSF measures. However, tau is a relatively stable protein with a slow turnover rate so that around 11 days are required before CSF changes can be observed [99, 100]. This may explain why, contrary to A $\beta$ , one night of acute sleep disruption could not be linked to an increase in CSF tau levels assessed on the subsequent morning in humans [52, 60]. In fact, worse home sleep quality measured with actigraphic recordings during the week preceding in-lab sleep disruption was positively associated with higher CSF tau levels [60]. In mouse models with plaques and tangles pathology, restricting sleep to 4 hr per day for 8 weeks [101], or to 6 hr per day for 6 weeks [102], led to elevated insoluble tau levels. Accordingly in humans, a large longitudinal cohort study found that actigraphic measures of better sleep consolidation in older individuals significantly attenuated the effect of APOE genotype on observed NFTs density at autopsy [103].

As for A $\beta$ , the link between sleep–wake regulation and tau is likely bidirectional. A longitudinal study in cognitively normal older individuals showed that higher CSF tau levels were predictive of overall poorer sleep quality after 3 years [104]. However, this association was only present in individuals with significant A $\beta$  deposition, further supporting the deleterious nature of tau and A $\beta$  co-existence [105]. In addition, a human tau and amyloid knock-in mouse model of AD exhibits increased wake bout duration combined with decreased rapid eye movement (REM) and non-REM sleep duration [106, 107]. Transgenic mice expressing tau without A $\beta$  abnormal accumulation display similar sleep–wake alterations, suggesting that tau pathology alone can induce impaired sleep and wakefulness in such animal models [108]. Of particular interest, the extent of the observed sleep impairments correlated with tau pathology intensity in brainstem regions regulating sleep [109]. Likewise, progressive supranuclear palsy, a tau only form of frontotemporal dementia that mainly involves brainstem and thalamic regions, was associated with more fragmented sleep and increased daytime sleepiness [110, 111], further suggesting a causal role for abnormal tau aggregation and sleep dysfunction.

Again similar to A $\beta$ , many other associations between tau pathology and sleep–wake regulation have been reported, but

it is difficult to identify the directionality of their interplay. In young and middle-aged individuals, OSA has been associated with elevated levels of tau protein concentration in blood [112, 113]. However, a recent study did not find any significant association between tau burden measured with PET and sleep-disordered breathing in a cohort of 119 older males [79]. In cognitively normal older people, CSF levels of phosphorylated tau were positively correlated with an increase in orexin concentration, potentially because elevated orexin levels favor fragmented sleep [114] as previously observed in people with AD [115, 116]. Akin to A $\beta$ , both objective and subjective measures of sleep quality (respectively, sleep efficiency derived from actigraphic recordings, and multidimensional self-reported scales) have been associated with elevated CSF tau levels [28, 60]. Finally, the fragmentation of the circadian rhythmicity of sleep and wakefulness positively correlates with the ratio between CSF phosphorylated tau and A $\beta$ 42, a sensitive predictor of cognitive decline in nondemented older individuals [82, 117].

Although convincingly demonstrated, proofs of the bidirectionality of the link between tau pathology and sleep-wake regulation are less numerous than for A $\beta$ . This probably resides in part in the absence of *in vivo* radiotracers for tau until very recently [118, 119], implying that one could only rely on CSF measures to infer tau burden *in vivo*. Although the first PET markers suffered from relatively unspecific bindings, the new generation seems to be particularly specific to tau [120] such that our understanding of the association between tau and the sleep-wake cycle is likely to grow swiftly.

Critically, chronic sleep-wake disruption was consistently associated with tau phosphorylation changes and long-lasting memory deficits not only in AD mouse models, but also in wild-type littermates [121]. This suggests that recurrent sleep deprivation plays a significant role in tau-related measures as well as cognitive outcomes, beyond at least some genetic AD predispositions. Whether improving sleep-wake quality would reduce tau burden, or slow down its progression to then improve cognition, has however not been tested yet. Likewise, no attempt has been made until now to address whether pharmacologically reducing tau burden would improve cognition via an enhancement of sleep-wake quality.

## Sleep-Wake Regulation and Neurodegeneration

Synaptic and neuronal loss represents one of the strongest pathological correlates of dementia [14, 122], and a reliable predictor of conversion from MCI to AD [123–125]. Neurodegeneration of the medial temporal lobe can be detected up to 4 years before the clinical diagnosis of AD and correlates with tau deposition as well as early memory deficits [126, 127]. The dynamic of brain atrophy mirrors the propagation of NFTs in early stages, and then neuronal loss is progressively observed in temporo-parietal cortices, and ultimately in frontal regions [128]. In asymptomatic individuals, it was suggested that baseline rates of brain atrophy are accelerated in those that further transition to MCI [129]. Although no magnetic resonance imaging (MRI) marker has been proved efficient to identify alone the preclinical stages of the disease, recent combinations of neuroimaging techniques hold strong potential for the early detection of preclinical AD [130].

As for tau and A $\beta$  burden, sleep-wake regulation is associated with neurodegeneration. In young adults, sleep continuity and sleep duration were associated with brain white matter integrity, based on measures of mean diffusivity derived from diffusion-weighted imaging [131]. In healthy older individuals, self-reported excessive daytime sleepiness and fatigue were associated with MRI measures of global and regional atrophy, as well as hippocampal volume reduction [132]. Similarly, MRI-based cortical thinning of several brain areas was linked to an age-related decrease in slow-wave density and amplitude, based on electroencephalographic measures during sleep [133]. In addition, reduction of REM sleep duration in participants with MCI was associated with grey matter loss in regions that are affected early in AD, such as the precuneus, the posterior cingulate, and the postcentral gyrus [134]. Likewise, actigraphic assessment of sleep-wake rhythm fragmentation was related to the atrophy of the medial temporal lobe measured by expert visual evaluation (use of visual scale, *i.e.* no computerized quantification of MRI images) [135].

In cognitively normal older individuals, sleep durations shorter and longer than 7 hr have been associated with higher rates of frontotemporal grey matter decline in longitudinal assessments over 8 years [136]. Others found that short sleep duration similarly affects the expansion rates of the ventricles [137]. Moreover, self-reported sleep quality indices correlated with the rate of cortical atrophy measured over an average of 3.5 years, in a widespread set of frontal, temporal, and parietal areas [138]. These longitudinal data suggest that sleep quality directly affects cortical atrophy. This view is further reinforced by the report of decreased neuron density in the locus coeruleus after extended wakefulness in wild-type mice [139]. Critically, chronic sleep restriction in mice leads to neuronal loss in the locus coeruleus that could not be compensated for after a 6 month recovery period in normal sleep conditions [140].

Normal aging is also associated with structural changes in sleep-wake regulating structures [141]. The locus coeruleus shows a limited decline in neuron number with age and undergoes a marked reduction in the number of its projections to the cortex and particularly to the prefrontal cortex [6, 142]. The basal forebrain, and especially the cholinergic neurons of the nucleus of Meynert [143], the suprachiasmatic nucleus corresponding to the master circadian clock [144], and the lateral hypothalamus secreting orexin and melanin-concentrating hormone [145], also exhibit a decrease in neuron and/or axonal density in aging. These deficits are further aggravated in AD [146–148]. However, the functional consequences of the changes in sleep-wake regulating subcortical structures are mostly unassessed. It is therefore unclear whether they directly contribute to the well-characterized degradation in sleep quality and sleep-wake regulation associated with aging [149].

Hence, age-related neurodegeneration must undoubtedly contribute to changes in sleep and wakefulness, but direct evidence remains scarce. How neurodegeneration contributes to AD through sleep remains therefore unclear. In turn, how sleep-wake dysfunction affects AD through neurodegeneration is not known. Addressing these issues is complicated notably because quantifying changes in brain structure *in vivo* is far from trivial. Although the first demonstrations of age-related changes in MRI data were interpreted as indications of neurodegeneration, recent research showed that these changes may reflect modifications in neuronal iron or axonal myelin content rather



than reflecting a mere loss of neurons [150, 151]. Crucially, the development of unbiased quantitative MRI [152] will provide important tools to address the link between sleep–wake quality and brain structure and microstructure.

## Conclusions

We reviewed findings indicating that disruption of sleep–wake regulation is linked to the hallmarks of AD pathogenesis in the preclinical stages of the disease, that is, many years before the cognitive symptoms emerge. Evidence for bidirectional relationships between sleep–wake regulation and the three hallmarks of AD pathophysiology has accumulated, albeit more convincingly with A $\beta$ . Recent technical developments in MRI and PET in vivo measures of brain structure will help establishing these relationships [130]. Yet, research is still limited by the sensitivity of current techniques. Indeed, PET imaging does not allow to quantify the earliest tau (e.g. in the brainstem) or A $\beta$  deposits. Besides, soluble forms of misfolded A $\beta$  and tau proteins may be more involved in AD progression and neuronal death compared with their aggregates [23, 153]. However, these soluble forms remain mostly undetectable in vivo and their impact on sleep–wake regulation is unknown. One could also consider that the locations of protein aggregates and of their soluble precursors are important, but this remains largely unexplored (see Mander et al. [77] for the importance of medial prefrontal A $\beta$  deposits for SWS).

The large time-window of AD pathophysiological progression is a great opportunity for preventive interventions. However, it also means that curative or preventive interventions may be applied too late in the process to be efficient, i.e. when irreversible damage has occurred [1]. Thus, the earliest aspects associated with AD pathogenesis need to be established. Factors related to sleep–wake regulation are, in our view, excellent candidates based on the findings reviewed here, but also given the fact that the first signs of tau deposition are detected, post mortem, in the locus coeruleus. However, these first deposits are undetectable in vivo, and their functional consequences are unknown [6]. In addition, tau accumulation may primarily represent age-related modifications, i.e. brain changes that are normal over the lifespan [154]. This does not preclude these protein accumulations, variable across individuals [64], to contribute to the observed variability in age-related changes in sleep–wake regulation, or to be caused by the latter variability. It is therefore highly needed, and yet highly challenging, to separate what constitutes normal neurodegeneration, protein accumulations, and sleep–wake changes from what will contribute to AD pathology decades later.

The definite proofs that improving sleep and wakefulness in the preclinical stages of the disease causally slows down the AD neuropathological processes over decades still need to be provided. Conversely, whether hindering tau and A $\beta$  accumulation as well as neurodegeneration may improve sleep has to be demonstrated. Longitudinal studies in interventional designs are of particular interest to provide these proofs, but they may not be available before long. Even in the absence of such evidence, one could consider applying cognitive behavioral therapy [155] or increasing the amplitude of the rest-activity cycle with light [156] and/or physical activity [157] to modulate AD neuropathological processes through improved sleep and

wakefulness quality. Given the high prevalence of sleep–wake complaints in our 24–7 society, these appear as useful examples of reasonable and easy strategies to improve brain function in the short term, and to decrease the odds of developing AD, particularly in those individuals that are more at risk.

## Funding

M.V.E., C.B., F.C., and G.V. are supported by the FNRS-Belgium. J.N. is supported by ULiège. D.C. and P.V.G. are supported by an Actions de Recherche Concertées Grant ARC 17/21-09 of the Fédération Wallonie-Bruxelles.

## References

- Scheltens P, et al. Alzheimer's disease. *Lancet*. 2016;388(10043):505–517.
- Cummings J, et al. Drug development in Alzheimer's disease: the path to 2025. *Alzheimer's Res Ther*. 2016;8(1):1–12.
- Mangialasche F, et al. Alzheimer's disease: clinical trials and drug development. *Lancet Neurol*. 2010;9(7):702–716.
- Prince M, et al. World Alzheimer Report 2015: the global impact of dementia - an analysis of prevalence, incidence, cost and trends. *Alzheimer's Dis Int*. 2015;84.
- Zissimopoulos J, et al. The value of delaying Alzheimer's disease onset. *Forum Heal Econ Policy*. 2015;18(1):25–39.
- Mather M, et al. The locus coeruleus: essential for maintaining cognitive function and the aging brain. *Trends Cogn Sci*. 2016;20(3):214–226.
- Norton S, et al. Potential for primary prevention of Alzheimer's disease: an analysis of population-based data. *Lancet Neurol*. 2014;13(8):788–794.
- Lim AS, et al. Sleep fragmentation and the risk of incident Alzheimer's disease and cognitive decline in older persons. *Sleep*. 2013;36(7):1027–1032.
- Hahn EA, et al. A change in sleep pattern may predict Alzheimer disease. *Am J Geriatr Psychiatry*. 2014;22(11):1262–1271.
- Landry GJ, et al. Buying time: a rationale for examining the use of circadian rhythm and sleep interventions to delay progression of mild cognitive impairment to Alzheimer's disease. *Front Aging Neurosci*. 2014;6:325.
- Benedict C, et al. Self-reported sleep disturbance is associated with Alzheimer's disease risk in men. *Alzheimers Dement*. 2015;11(9):1090–1097.
- Musiek ES, et al. Mechanisms linking circadian clocks, sleep, and neurodegeneration. *Science*. 2016;354(6315):1004–1008.
- Bubu OM, et al. Sleep, cognitive impairment and Alzheimer's disease: a systematic review and meta-analysis. *Sleep*. 2016;40(1):1–18.
- Jack CR Jr, et al. Hypothetical model of dynamic biomarkers of the Alzheimer's pathological cascade. *Lancet Neurol*. 2010;9(1):119–128.
- Jack CR Jr, et al. Tracking pathophysiological processes in Alzheimer's disease: an updated hypothetical model of dynamic biomarkers. *Lancet Neurol*. 2013;12(2):207–216.
- Roe CM, et al. Amyloid imaging and CSF biomarkers in predicting cognitive impairment up to 7.5 years later. *Neurology*. 2013;80(19):1784–1791.
- Sperling RA, et al. Toward defining the preclinical stages of Alzheimer's disease: recommendations from the National Institute on Aging-Alzheimer's Association workgroups on

- diagnostic guidelines for Alzheimer's disease. *Alzheimers Dement*. 2011;7(3):280–292.
18. Kim J, et al. The role of apolipoprotein E in Alzheimer's disease. *Neuron*. 2009;63(3):287–303.
  19. Michaelson DM. APOE  $\epsilon$ 4: the most prevalent yet understudied risk factor for Alzheimer's disease. *Alzheimers Dement*. 2014;10(6):861–868.
  20. Poirier J, et al. Apolipoprotein E polymorphism and Alzheimer's disease. *Lancet*. 1993;342(8873):697–699.
  21. Tanzi RE. The genetics of Alzheimer disease. *Cold Spring Harb Perspect Med*. 2012;2(10):a006296.
  22. Zhu XC, et al. Rate of early onset Alzheimer's disease: a systematic review and meta-analysis. *Ann Transl Med*. 2015;3(3):38.
  23. Masters CL, et al. Biochemistry of amyloid  $\beta$ -protein and amyloid deposits in Alzheimer disease. *Cold Spring Harb Perspect Med*. 2012;2(6):a006262.
  24. De Strooper B, et al. The secretases: enzymes with therapeutic potential in Alzheimer disease. *Nat Rev Neurol*. 2010;6(2):99–107.
  25. Kim J, et al. Abeta40 inhibits amyloid deposition in vivo. *J Neurosci*. 2007;27(3):627–633.
  26. Lambert MP, et al. Diffusible, nonfibrillar ligands derived from Abeta1-42 are potent central nervous system neurotoxins. *Proc Natl Acad Sci USA*. 1998;95(11):6448–6453.
  27. Murphy MP, et al. Alzheimer's disease and the amyloid-beta peptide. *J Alzheimers Dis*. 2010;19(1):311–323.
  28. Sprecher KE, et al. Poor sleep is associated with CSF biomarkers of amyloid pathology in cognitively normal adults. *Neurology*. 2017;89(5):445–453.
  29. Palmqvist S, et al. Cerebrospinal fluid analysis detects cerebral amyloid- $\beta$  accumulation earlier than positron emission tomography. *Brain*. 2016;139(4):1226–1236.
  30. Thal DR, et al. Phases of A beta-deposition in the human brain and its relevance for the development of AD. *Neurology*. 2002;58(12):1791–1800.
  31. Hardy J, et al. The amyloid hypothesis of Alzheimer's disease: progress and problems on the road to therapeutics. *Science*. 2002;297(5580):353–356.
  32. Hardy JA, et al. Alzheimer's disease: the amyloid cascade hypothesis. *Science*. 1992;256(5054):184–185.
  33. Haass C, et al. Soluble protein oligomers in neurodegeneration: lessons from the Alzheimer's amyloid beta-peptide. *Nat Rev Mol Cell Biol*. 2007;8(2):101–112.
  34. Drachman DA. The amyloid hypothesis, time to move on: amyloid is the downstream result, not cause, of Alzheimer's disease. *Alzheimers Dement*. 2014;10(3):372–380.
  35. Karran E, et al. The amyloid cascade hypothesis for Alzheimer's disease: an appraisal for the development of therapeutics. *Nat Rev Drug Discov*. 2011;10(9):698–712.
  36. Marchesi VT. Alzheimer's dementia begins as a disease of small blood vessels, damaged by oxidative-induced inflammation and dysregulated amyloid metabolism: implications for early detection and therapy. *FASEB J*. 2011;25(1):5–13.
  37. Simic G, et al. Does Alzheimer's disease begin in the brainstem? *Neuropathol Appl Neurobiol*. 2009;35(6):532–554.
  38. Musiek ES, et al. Three dimensions of the amyloid hypothesis: time, space and 'wingmen'. *Nat Neurosci*. 2015;18(6):800–806.
  39. Kang JE, et al. Amyloid-beta dynamics are regulated by orexin and the sleep-wake cycle. *Science*. 2009;326(5955):1005–1007.
  40. Huang Y, et al. Effects of age and amyloid deposition on A $\beta$  dynamics in the human central nervous system. *Arch Neurol*. 2012;69(1):51–58.
  41. Mendelsohn AR, et al. Sleep facilitates clearance of metabolites from the brain: glymphatic function in aging and neurodegenerative diseases. *Rejuvenation Res*. 2013;16(6):518–523.
  42. Xie L, et al. Sleep drives metabolite clearance from the adult brain. *Science*. 2013;342(6156):373–377.
  43. Westerman MA, et al. The relationship between Abeta and memory in the Tg2576 mouse model of Alzheimer's disease. *J Neurosci*. 2002;22(5):1858–1867.
  44. Hsiao K, et al. Correlative memory deficits, Abeta elevation, and amyloid plaques in transgenic mice. *Science*. 1996;274(5284):99–102.
  45. Chemelli RM, et al. Narcolepsy in orexin knockout mice: molecular genetics of sleep regulation. *Cell*. 1999;98(4):437–451.
  46. Mahler SV, et al. Motivational activation: a unifying hypothesis of orexin/hypocretin function. *Nat Neurosci*. 2014;17(10):1298–1303.
  47. Roh JH, et al. Potential role of orexin and sleep modulation in the pathogenesis of Alzheimer's disease. *J Exp Med*. 2014;211(13):2487–2496.
  48. Nedergaard M. Neuroscience. Garbage truck of the brain. *Science*. 2013;340(6140):1529–1530.
  49. Nakada T, et al. Fluid dynamics inside the brain barrier: current concept of interstitial flow, glymphatic flow, and cerebrospinal fluid circulation in the brain. *Neuroscientist*. 2018;6:1–12.
  50. Rainey-Smith SR, et al. Genetic variation in Aquaporin-4 moderates the relationship between sleep and brain A $\beta$ -Amyloid burden. *Transl Psychiatry*. 2018;8(1).
  51. Rasmussen MK, et al. The glymphatic pathway in neurological disorders. *Lancet Neurol*. 2018;17(11):1016–1024.
  52. Ooms S, et al. Effect of 1 night of total sleep deprivation on cerebrospinal fluid  $\beta$ -amyloid 42 in healthy middle-aged men: a randomized clinical trial. *JAMA Neurol*. 2014;71(8):971–977.
  53. Chen L, et al. Sleep deprivation accelerates the progression of Alzheimer's disease by influencing A $\beta$ -related metabolism. *Neurosci Lett*. 2017;650:146–152.
  54. Shokri-Kojori E, et al.  $\beta$ -Amyloid accumulation in the human brain after one night of sleep deprivation. *Proc Natl Acad Sci USA*. 2018;115(17):4483–4488.
  55. Nir Y, et al. Regional slow waves and spindles in human sleep. *Neuron*. 2011;70(1):153–169.
  56. Bero AW, et al. Neuronal activity regulates the regional vulnerability to amyloid- $\beta$  deposition. *Nat Neurosci*. 2011;14(6):750–756.
  57. Cirrito JR, et al. Synaptic activity regulates interstitial fluid amyloid-beta levels in vivo. *Neuron*. 2005;48(6):913–922.
  58. Roh JH, et al. Disruption of the sleep-wake cycle and diurnal fluctuation of  $\beta$ -amyloid in mice with Alzheimer's disease pathology. *Sci Transl Med*. 2012;4(150):150:ra122.
  59. Varga AW, et al. Reduced slow-wave sleep is associated with high cerebrospinal fluid A $\beta$ 42 levels in cognitively normal elderly. *Sleep*. 2016;39(11):2041–2048.
  60. Ju YS, et al. Slow wave sleep disruption increases cerebrospinal fluid amyloid- $\beta$  levels. *Brain*. 2017;140(8):2104–2111.
  61. Lucey BP, et al. Effect of sleep on overnight cerebrospinal fluid amyloid  $\beta$  kinetics. *Ann Neurol*. 2018;83(1):197–204.
  62. Mander BA, et al. Sleep and human aging. *Neuron*. 2017;94(1):19–36.
  63. Carrier J, et al. Sleep slow wave changes during the middle years of life. *Eur J Neurosci*. 2011;33(4):758–766.

64. Braak H, et al. Stages of the pathologic process in Alzheimer disease: age categories from 1 to 100 years. *J Neuropathol Exp Neurol*. 2011;**70**(11):960–969.
65. Dufort-Gervais J, et al. Bidirectional relationships between sleep and amyloid-beta in the hippocampus. *Neurobiol Learn Mem*. 2018; In Press.
66. Cedernaes J, et al. Candidate mechanisms underlying the association between sleep-wake disruptions and Alzheimer's disease. *Sleep Med Rev*. 2017;**31**:102–111.
67. Ju YE, et al. Sleep and Alzheimer disease pathology – a bidirectional relationship. *Nat Rev Neurol*. 2014;**10**(2):115–119.
68. Busche MA, et al. Rescue of long-range circuit dysfunction in Alzheimer's disease models. *Nat Neurosci*. 2015;**18**(11):1623–1630.
69. Dissel S, et al. Enhanced sleep reverses memory deficits and underlying pathology in Drosophila models of Alzheimer's disease. *Neurobiol Sleep Circadian Rhythms*. 2017;**2**:15–26.
70. Spira AP, et al. Self-reported sleep and  $\beta$ -amyloid deposition in community-dwelling older adults. *JAMA Neurol*. 2013;**70**(12):1537–1543.
71. Sprecher KE, et al. Amyloid burden is associated with self-reported sleep in nondemented late middle-aged adults. *Neurobiol Aging*. 2015;**36**(9):2568–2576.
72. Branger P, et al. Relationships between sleep quality and brain volume, metabolism, and amyloid deposition in late adulthood. *Neurobiol Aging*. 2016;**41**:107–114.
73. Carvalho DZ, et al. Association of excessive daytime sleepiness with longitudinal  $\beta$ -amyloid accumulation in elderly persons without dementia. *JAMA Neurol*. 2018;**75**(6):672–680.
74. Spira AP, et al. Excessive daytime sleepiness and napping in cognitively normal adults: associations with subsequent amyloid deposition measured by PiB PET. *Sleep*. 2018;**41**(10):1–7.
75. Brown BM, et al.; AIBL Research Group. The relationship between sleep quality and brain amyloid burden. *Sleep*. 2016;**39**(5):1063–1068.
76. Ju YE, et al. Sleep quality and preclinical Alzheimer disease. *JAMA Neurol*. 2013;**70**(5):587–593.
77. Mander BA, et al.  $\beta$ -amyloid disrupts human NREM slow waves and related hippocampus-dependent memory consolidation. *Nat Neurosci*. 2015;**18**(7):1051–1057.
78. Andrade AG, et al. The relationship between obstructive sleep apnea and Alzheimer's disease. *J Alzheimers Dis*. 2018;**64**(s1):S255–S270.
79. Elias A, et al. Risk of Alzheimer's disease in obstructive sleep apnea syndrome: amyloid- $\beta$  and Tau imaging. *J Alzheimers Dis*. 2018;**66**(2):733–741.
80. Sharma RA, et al. Obstructive sleep apnea severity affects amyloid burden in cognitively normal elderly. A longitudinal study. *Am J Respir Crit Care Med*. 2018;**197**(7):933–943.
81. Ju YE, et al. Obstructive sleep apnea decreases central nervous system-derived proteins in the cerebrospinal fluid. *Ann Neurol*. 2016;**80**(1):154–159.
82. Musiek ES, et al. Circadian rest-activity pattern changes in aging and preclinical Alzheimer disease. *JAMA Neurol*. 2018;**75**(5):582–590.
83. Molano JRV, et al. The interaction of sleep and amyloid deposition on cognitive performance. *J Sleep Res*. 2017;**26**(3):288–292.
84. Yaffe K, et al. Connections between sleep and cognition in older adults. *Lancet Neurol*. 2014;**13**(10):1017–1028.
85. Bilgel M, et al. Effects of amyloid pathology and neurodegeneration on cognitive change in cognitively normal adults. *Brain*. 2018;**141**:2475–2485.
86. Mieltska-Porowska A, et al. Tau protein modifications and interactions: their role in function and dysfunction. *Int J Mol Sci*. 2014;**15**(3):4671–4713.
87. Spillantini MG, et al. Tau pathology and neurodegeneration. *Lancet Neurol*. 2013;**12**(6):609–622.
88. Nelson PT, et al. Correlation of Alzheimer disease neuropathologic changes with cognitive status: a review of the literature. *J Neuropathol Exp Neurol*. 2012;**71**(5):362–381.
89. Gómez-Ramos A, et al. Extracellular tau is toxic to neuronal cells. *FEBS Lett*. 2006;**580**(20):4842–4850.
90. Spires-Jones TL, et al. Are tangles as toxic as they look? *J Mol Neurosci*. 2011;**45**(3):438–444.
91. Fox LM, et al. Soluble tau species, not neurofibrillary aggregates, disrupt neural system integration in a tau transgenic model. *J Neuropathol Exp Neurol*. 2011;**70**(7):588–595.
92. Braak H, et al. Neuropathological staging of Alzheimer-related changes. *Acta Neuropathol*. 1991;**82**(4):239–259.
93. Braak H, et al. The pathological process underlying Alzheimer's disease in individuals under thirty. *Acta Neuropathol*. 2011;**121**(2):171–181.
94. Saper CB, et al. Hypothalamic regulation of sleep and circadian rhythms. *Nature*. 2005;**437**(7063):1257–1263.
95. Braak H, et al. Staging of Alzheimer disease-associated neurofibrillary pathology using paraffin sections and immunocytochemistry. *Acta Neuropathol*. 2006;**112**(4):389–404.
96. Price JL, et al. Tangles and plaques in nondemented aging and “preclinical” Alzheimer's disease. *Ann Neurol*. 1999;**45**(3):358–368.
97. Price JL, et al. Neuropathology of nondemented aging: presumptive evidence for preclinical Alzheimer disease. *Neurobiol Aging*. 2009;**30**(7):1026–1036.
98. Brier MR, et al. Tau and A $\beta$  imaging, CSF measures, and cognition in Alzheimer's disease. *Sci Transl Med*. 2016;**8**(338):338ra66.
99. Yamada K, et al. Neuronal activity regulates extracellular tau in vivo. *J Exp Med*. 2014;**211**(3):387–393.
100. Price JC, et al. Analysis of proteome dynamics in the mouse brain. *Proc Natl Acad Sci USA*. 2010;**107**(32):14508–14513.
101. Di Meco A, et al. Sleep deprivation impairs memory, tau metabolism, and synaptic integrity of a mouse model of Alzheimer's disease with plaques and tangles. *Neurobiol Aging*. 2014;**35**(8):1813–1820.
102. Rothman SM, et al. Chronic mild sleep restriction accentuates contextual memory impairments, and accumulations of cortical A $\beta$  and pTau in a mouse model of Alzheimer's disease. *Brain Res*. 2013;**1529**:200–208.
103. Lim AS, et al. Modification of the relationship of the apolipoprotein E  $\epsilon$ 4 allele to the risk of Alzheimer disease and neurofibrillary tangle density by sleep. *JAMA Neurol*. 2013;**70**(12):1544–1551.
104. Fjell AM, et al. Neuroinflammation and Tau interact with amyloid in predicting sleep problems in aging independently of atrophy. *Cereb Cortex*. 2017;(May 2018):1–11.
105. Medeiros R, et al. The role of tau in Alzheimer's disease and related disorders. *CNS Neurosci Ther*. 2011;**17**(5):514–524.
106. Platt B, et al. Abnormal cognition, sleep, EEG and brain metabolism in a novel knock-in Alzheimer mouse, PLB1. *PLoS One*. 2011;**6**(11):e27068.
107. Jyoti A, et al. Progressive age-related changes in sleep and EEG profiles in the PLB1 Triple mouse model of Alzheimer's disease. *Neurobiol Aging*. 2015;**36**(10):2768–2784.
108. Stevanovic K, et al. Disruption of normal circadian clock function in a mouse model of tauopathy. *Exp Neurol*. 2017;**294**:58–67.



109. Holth JK, et al. Altered sleep and EEG power in the P301S Tau transgenic mouse model. *Ann Clin Transl Neurol.* 2017;4(3):180–190.
110. Walsh CM, et al. Sleepless night and day, the plight of progressive supranuclear palsy. *Sleep.* 2017;40(11):zsz154. doi:10.1093/sleep/zsx154
111. Arnulf I, et al. REM sleep behavior disorder and REM sleep without atonia in patients with progressive supranuclear palsy. *Sleep.* 2005;28(3):349–354.
112. Bu XL, et al. Serum amyloid-beta levels are increased in patients with obstructive sleep apnea syndrome. *Sci Rep.* 2015;5:13917.
113. Motamedi V, et al. Elevated Tau and interleukin-6 concentrations in adults with obstructive sleep apnea. *Sleep Med.* 2018;43:71–76.
114. Osorio RS, et al. Orexin-A is associated with increases in cerebrospinal fluid phosphorylated-Tau in cognitively normal elderly subjects. *Sleep.* 2016;39(6):1253–1260.
115. Slats D, et al. Reciprocal interactions between sleep, circadian rhythms and Alzheimer's disease: focus on the role of hypocretin and melatonin. *Ageing Res Rev.* 2013;12(1):188–200.
116. Liguori C, et al. Orexinergic system dysregulation, sleep impairment, and cognitive decline in Alzheimer disease. *JAMA Neurol.* 2014;71(12):1498–1505.
117. Fagan AM, et al. Cerebrospinal fluid tau/beta-amyloid(42) ratio as a prediction of cognitive decline in nondemented older adults. *Arch Neurol.* 2007;64(3):343–349.
118. Harada R, et al. 18F-THK5351: a novel PET radiotracer for imaging neurofibrillary pathology in Alzheimer disease. *J Nucl Med.* 2016;57(2):208–214.
119. Schöll M, et al. PET imaging of tau deposition in the aging human brain. *Neuron.* 2016;89(5):971–982.
120. Villemagne VL, et al. Author correction: imaging tau and amyloid- $\beta$  proteinopathies in Alzheimer disease and other conditions. *Nat Rev Neurol.* 2018;14(7):446.
121. Qiu H, et al. Chronic sleep deprivation exacerbates learning-memory disability and Alzheimer's disease-like pathologies in A $\beta$ PP(swe)/PS1( $\Delta$ E9) mice. *J Alzheimers Dis.* 2016;50(3):669–685.
122. Terry RD, et al. Physical basis of cognitive alterations in Alzheimer's disease: synapse loss is the major correlate of cognitive impairment. *Ann Neurol.* 1991;30(4):572–580.
123. de Leon MJ, et al. MRI and CSF studies in the early diagnosis of Alzheimer's disease. *J Intern Med.* 2004;256(3):205–223.
124. Bouwman FH, et al. CSF biomarkers and medial temporal lobe atrophy predict dementia in mild cognitive impairment. *Neurobiol Aging.* 2007;28(7):1070–1074.
125. Vemuri P, et al.; Alzheimer's Disease Neuroimaging Initiative. MRI and CSF biomarkers in normal, MCI, and AD subjects: predicting future clinical change. *Neurology.* 2009;73(4):294–301.
126. Frisoni GB, et al. The clinical use of structural MRI in Alzheimer disease. *Nat Rev Neurol.* 2010;6(2):67–77.
127. Villemagne VL, et al.; Australian Imaging Biomarkers and Lifestyle (AIBL) Research Group. Amyloid  $\beta$  deposition, neurodegeneration, and cognitive decline in sporadic Alzheimer's disease: a prospective cohort study. *Lancet Neurol.* 2013;12(4):357–367.
128. Thompson PM, et al. Dynamics of gray matter loss in Alzheimer's disease. *J Neurosci.* 2003;23(3):994–1005.
129. Fotenos AF, et al. Normative estimates of cross-sectional and longitudinal brain volume decline in aging and AD. *Neurology.* 2005;64(6):1032–1039.
130. Khan TK. An algorithm for preclinical diagnosis of Alzheimer's disease. *Front Neurosci.* 2018;12:275.
131. Takeuchi H, et al. Shorter sleep duration and better sleep quality are associated with greater tissue density in the brain. *Sci Rep.* 2018;8(1):1–8. doi:10.1038/s41598-018-24226-0
132. Carvalho DZ, et al. Excessive daytime sleepiness and fatigue may indicate accelerated brain aging in cognitively normal late middle-aged and older adults. *Sleep Med.* 2017;32:236–243.
133. Dubé J, et al. Cortical thinning explains changes in sleep slow waves during adulthood. *J Neurosci.* 2015;35(20):7795–7807.
134. Sanchez-Espinosa MP, et al. Sleep deficits in mild cognitive impairment are related to increased levels of plasma amyloid- $\beta$  and cortical thinning. *Neuroimage.* 2014;98:395–404.
135. Van Someren EJW, et al. Medial temporal lobe atrophy relates more strongly to sleep-wake rhythm fragmentation than to age or any other known risk. *Neurobiol Learn Mem.* 2018; In Press. doi:10.1016/j.nlm.2018.05.017
136. Spira AP, et al. Sleep duration and subsequent cortical thinning in cognitively normal older adults. *Sleep.* 2016;39(5):1121–1128. doi:10.5665/sleep.5768
137. Lo JC, et al. Sleep duration and age-related changes in brain structure and cognitive performance. *Sleep.* 2014;37(7):1171–1178.
138. Sexton CE, et al. Poor sleep quality is associated with increased cortical atrophy in community-dwelling adults. *Neurology.* 2014;83(11):967–973.
139. Zhang J, et al. Extended wakefulness: compromised metabolics in and degeneration of locus ceruleus neurons. *J Neurosci.* 2014;34(12):4418–4431.
140. Zhu Y, et al. Selective loss of catecholaminergic wake active neurons in a murine sleep apnea model. *J Neurosci.* 2007;27(37):10060–10071.
141. Farajnia S, et al. Aging of the suprachiasmatic clock. *Neuroscientist.* 2014;20(1):44–55.
142. Manaye KF, et al. Locus coeruleus cell loss in the aging human brain: a non-random process. *J Comp Neurol.* 1995;358(1):79–87.
143. Nyakas C, et al. The basal forebrain cholinergic system in aging and dementia. Rescuing cholinergic neurons from neurotoxic amyloid- $\beta$ 42 with memantine. *Behav Brain Res.* 2011;221(2):594–603.
144. Palomba M, et al. Decline of the presynaptic network, including GABAergic terminals, in the aging suprachiasmatic nucleus of the mouse. *J Biol Rhythms.* 2008;23(3):220–231.
145. Brownell SE, et al. Age- and gender-specific changes of hypocretin immunopositive neurons in C57Bl/6 mice. *Neurosci Lett.* 2010;472(1):29–32.
146. Stern AL, et al. Wake-active neurons across aging and neurodegeneration: a potential role for sleep disturbances in promoting disease. *Springerplus.* 2015;4:25.
147. Satoh A, et al. Roles of tau pathology in the locus coeruleus (LC) in age-associated pathophysiology and Alzheimer's disease pathogenesis: Potential strategies to protect the LC against aging. *Brain Res.* 2019;1702:17–28. doi:10.1016/j.brainres.2017.12.027
148. Holth JK, et al. Sleep in Alzheimer's disease – beyond amyloid. *Neurobiol Sleep Circadian Rhythm.* 2017;2:4–14.
149. Schmidt C, et al. Age-related changes in sleep and circadian rhythms: impact on cognitive performance and underlying neuroanatomical networks. *Front Neurol.* 2012;3:118.



150. Lambert C, et al. Characterizing aging in the human brainstem using quantitative multimodal MRI analysis. *Front Hum Neurosci*. 2013;7:462.
151. Callaghan MF, et al. Widespread age-related differences in the human brain microstructure revealed by quantitative magnetic resonance imaging. *Neurobiol Aging*. 2014;35(8):1862–1872.
152. Weiskopf N, et al. Advances in MRI-based computational neuroanatomy: from morphometry to in-vivo histology. *Curr Opin Neurol*. 2015;28(4):313–322.
153. Kopeikina KJ, et al. Soluble forms of tau are toxic in Alzheimer's disease. *Transl Neurosci*. 2012;3(3):223–233.
154. Duyckaerts C, et al. PART is part of Alzheimer disease. *Acta Neuropathol*. 2015;129(5):749–756.
155. Morin CM, et al. Cognitive behavioral therapy, singly and combined with medication, for persistent insomnia: a randomized controlled trial. *JAMA*. 2009;301(19):2005–2015.
156. Van Someren EJ, et al. Bright light therapy: improved sensitivity to its effects on rest-activity rhythms in Alzheimer patients by application of nonparametric methods. *Chronobiol Int*. 1999;16(4):505–518.
157. Yang PY, et al. Exercise training improves sleep quality in middle-aged and older adults with sleep problems: a systematic review. *J Physiother*. 2012;58(3):157–163.
